# Supplementary material for: Human cortical folding across regions within individual brains follows universal scaling law
Source: PubMed Central journal article supplement (PMC6527703; doi:10.1038/s42003-019-0421-7), 2019-05-20
Supplement: 42003_2019_421_MOESM1_ESM.pdf [file 42003_2019_421_MOESM1_ESM.pdf]

## Reporting Summary

Nature Research wishes to improve the reproducibility of the work that we publish. This form provides structure for consistency and transparency in reporting. For further information on Nature Research policies, see [Authors & Referees](#) and the [Editorial Policy Checklist](#).

### Statistics

For all statistical analyses, confirm that the following items are present in the figure legend, table legend, main text, or Methods section.

n/a Confirmed

- The exact sample size ( $n$ ) for each experimental group/condition, given as a discrete number and unit of measurement
- A statement on whether measurements were taken from distinct samples or whether the same sample was measured repeatedly
- The statistical test(s) used AND whether they are one- or two-sided  
*Only common tests should be described solely by name; describe more complex techniques in the Methods section.*
- A description of all covariates tested
- A description of any assumptions or corrections, such as tests of normality and adjustment for multiple comparisons
- A full description of the statistical parameters including central tendency (e.g. means) or other basic estimates (e.g. regression coefficient) AND variation (e.g. standard deviation) or associated estimates of uncertainty (e.g. confidence intervals)
- For null hypothesis testing, the test statistic (e.g.  $F$ ,  $t$ ,  $r$ ) with confidence intervals, effect sizes, degrees of freedom and  $P$  value noted  
*Give  $P$  values as exact values whenever suitable.*
- For Bayesian analysis, information on the choice of priors and Markov chain Monte Carlo settings
- For hierarchical and complex designs, identification of the appropriate level for tests and full reporting of outcomes
- Estimates of effect sizes (e.g. Cohen's  $d$ , Pearson's  $r$ ), indicating how they were calculated

*Our web collection on [statistics for biologists](#) contains articles on many of the points above.*

### Software and code

Policy information about [availability of computer code](#)

Data collection

Freesurfer was used to reconstruct the cortical surfaces. Different versions of Freesurfer were used (documented in detail in Suppl Text F), as the cortical surfaces were sometimes provided by open databases (such as HCP).

Data analysis

Custom code was used in this study to derive various measures from a cortical surface. The code will be released together with the data (on Zenodo) upon acceptance of the manuscript.

For manuscripts utilizing custom algorithms or software that are central to the research but not yet described in published literature, software must be made available to editors/reviewers. We strongly encourage code deposition in a community repository (e.g. GitHub). See the Nature Research [guidelines for submitting code & software](#) for further information.

### Data

Policy information about [availability of data](#)

All manuscripts must include a [data availability statement](#). This statement should provide the following information, where applicable:

- Accession codes, unique identifiers, or web links for publicly available datasets
- A list of figures that have associated raw data
- A description of any restrictions on data availability

Full data (of all surface area, thickness, and curvature values in subjects) and analysis code will be made available upon acceptance of the manuscript on zenodo (link).

## Field-specific reporting

Please select the one below that is the best fit for your research. If you are not sure, read the appropriate sections before making your selection.

Life sciences       Behavioural & social sciences       Ecological, evolutionary & environmental sciences

For a reference copy of the document with all sections, see [nature.com/documents/nr-reporting-summary-flat.pdf](https://www.nature.com/documents/nr-reporting-summary-flat.pdf)

## Life sciences study design

All studies must disclose on these points even when the disclosure is negative.

|                 |                                                                                                                     |
|-----------------|---------------------------------------------------------------------------------------------------------------------|
| Sample size     | Sample sizes were not determined by a power calculation, but driven by data availability in large public databases. |
| Data exclusions | Data from the databases (subjects) were only excluded if their neuroimaging reconstruction in Freesurfer failed.    |
| Replication     | We use three public databases using healthy human subjects to verify our results.                                   |
| Randomization   | N/A                                                                                                                 |
| Blinding        | N/A                                                                                                                 |

## Reporting for specific materials, systems and methods

We require information from authors about some types of materials, experimental systems and methods used in many studies. Here, indicate whether each material, system or method listed is relevant to your study. If you are not sure if a list item applies to your research, read the appropriate section before selecting a response.

### Materials & experimental systems

### Methods

|                                     |                                                      |
|-------------------------------------|------------------------------------------------------|
| n/a                                 | Involvement in the study                             |
| <input checked="" type="checkbox"/> | <input type="checkbox"/> Antibodies                  |
| <input checked="" type="checkbox"/> | <input type="checkbox"/> Eukaryotic cell lines       |
| <input checked="" type="checkbox"/> | <input type="checkbox"/> Palaeontology               |
| <input checked="" type="checkbox"/> | <input type="checkbox"/> Animals and other organisms |
| <input checked="" type="checkbox"/> | <input type="checkbox"/> Human research participants |
| <input checked="" type="checkbox"/> | <input type="checkbox"/> Clinical data               |

|                                     |                                                            |
|-------------------------------------|------------------------------------------------------------|
| n/a                                 | Involvement in the study                                   |
| <input checked="" type="checkbox"/> | <input type="checkbox"/> ChIP-seq                          |
| <input checked="" type="checkbox"/> | <input type="checkbox"/> Flow cytometry                    |
| <input type="checkbox"/>            | <input checked="" type="checkbox"/> MRI-based neuroimaging |

## Magnetic resonance imaging

### Experimental design

|                                 |                                                                                                |
|---------------------------------|------------------------------------------------------------------------------------------------|
| Design type                     | Only structural (T1w) neuroimages used. We were only interested in the morphology of the brain |
| Design specifications           | N/A                                                                                            |
| Behavioral performance measures | N/A                                                                                            |

### Acquisition

|                               |                                                                                |
|-------------------------------|--------------------------------------------------------------------------------|
| Imaging type(s)               | structural                                                                     |
| Field strength                | varies between 1.5 and 3T depending on dataset, see Suppl Table F1 for details |
| Sequence & imaging parameters | Varies depending on dataset, see Suppl Table F1 for details                    |
| Area of acquisition           | Whole cortex                                                                   |
| Diffusion MRI                 | <input type="checkbox"/> Used <input checked="" type="checkbox"/> Not used     |

### Preprocessing

|                        |                                                                                                                                                                        |
|------------------------|------------------------------------------------------------------------------------------------------------------------------------------------------------------------|
| Preprocessing software | If not specified, we use the Freesurfer standard recon-all setting. However, some brain surfaces were provided by the database. Details can be found in Suppl Table F1 |
|------------------------|------------------------------------------------------------------------------------------------------------------------------------------------------------------------|

|                            |                                                                                                                                                                                                                             |
|----------------------------|-----------------------------------------------------------------------------------------------------------------------------------------------------------------------------------------------------------------------------|
| Normalization              | Data were normalised using standard Freesurfer tools as part of the recon-all processing. See <a href="https://surfer.nmr.mgh.harvard.edu/fswiki/mri_normalize">https://surfer.nmr.mgh.harvard.edu/fswiki/mri_normalize</a> |
| Normalization template     | Subject space                                                                                                                                                                                                               |
| Noise and artifact removal | Bias field correction was performed using standard freesurfer tools as part of the recon-all pipeline                                                                                                                       |
| Volume censoring           | No specific ROI/volume has been censored.                                                                                                                                                                                   |

### Statistical modeling & inference

|                                                                           |                                                                                                                  |
|---------------------------------------------------------------------------|------------------------------------------------------------------------------------------------------------------|
| Model type and settings                                                   | Various different models have been applied, described in Methods.                                                |
| Effect(s) tested                                                          | No task/stimulus condition used                                                                                  |
| Specify type of analysis:                                                 | <input type="checkbox"/> Whole brain <input type="checkbox"/> ROI-based <input checked="" type="checkbox"/> Both |
| Anatomical location(s)                                                    | Freesurfer's Desikan-Killiany Atlas                                                                              |
| Statistic type for inference<br>(See <a href="#">Eklund et al. 2016</a> ) | N/A                                                                                                              |
| Correction                                                                | Specific to parts of the different analyses, specified where needed.                                             |

### Models & analysis

| n/a                                 | Included in the study                                                 |
|-------------------------------------|-----------------------------------------------------------------------|
| <input checked="" type="checkbox"/> | <input type="checkbox"/> Functional and/or effective connectivity     |
| <input checked="" type="checkbox"/> | <input type="checkbox"/> Graph analysis                               |
| <input checked="" type="checkbox"/> | <input type="checkbox"/> Multivariate modeling or predictive analysis |
